# Supplementary material
Source: PubMed Central journal article supplement (PMC6771731)

**Supplementary Figure S3: Estimated effects of supply of food and lifestyle commodities on energy consumed**

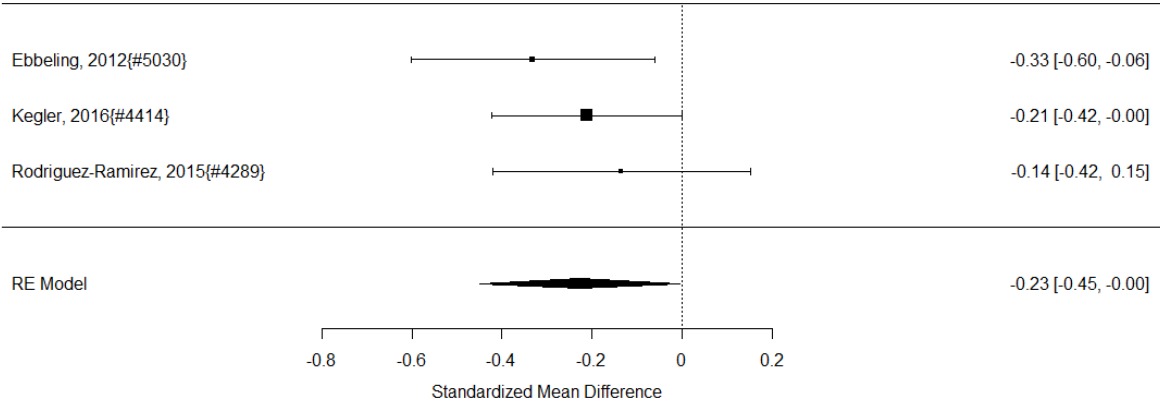

Supplement: OBY-27-1390-s003.pdf [file OBY-27-1390-s003.pdf]
