# Supplementary material
Source: PubMed Central journal article supplement (PMC6771731)

## Supplementary Figure S4: Estimated effects of worksite interventions -Energy expended

on energy expended

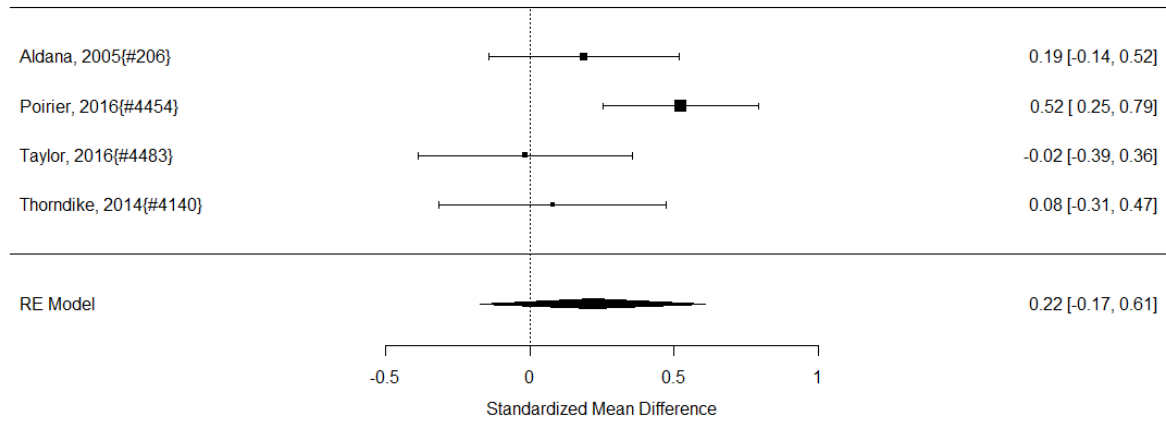

Supplement: OBY-27-1390-s004.pdf [file OBY-27-1390-s004.pdf]
