# Supplementary material
Source: PubMed Central journal article supplement (PMC6771731)

Supplementary Figure S2. Literature Flow Diagram

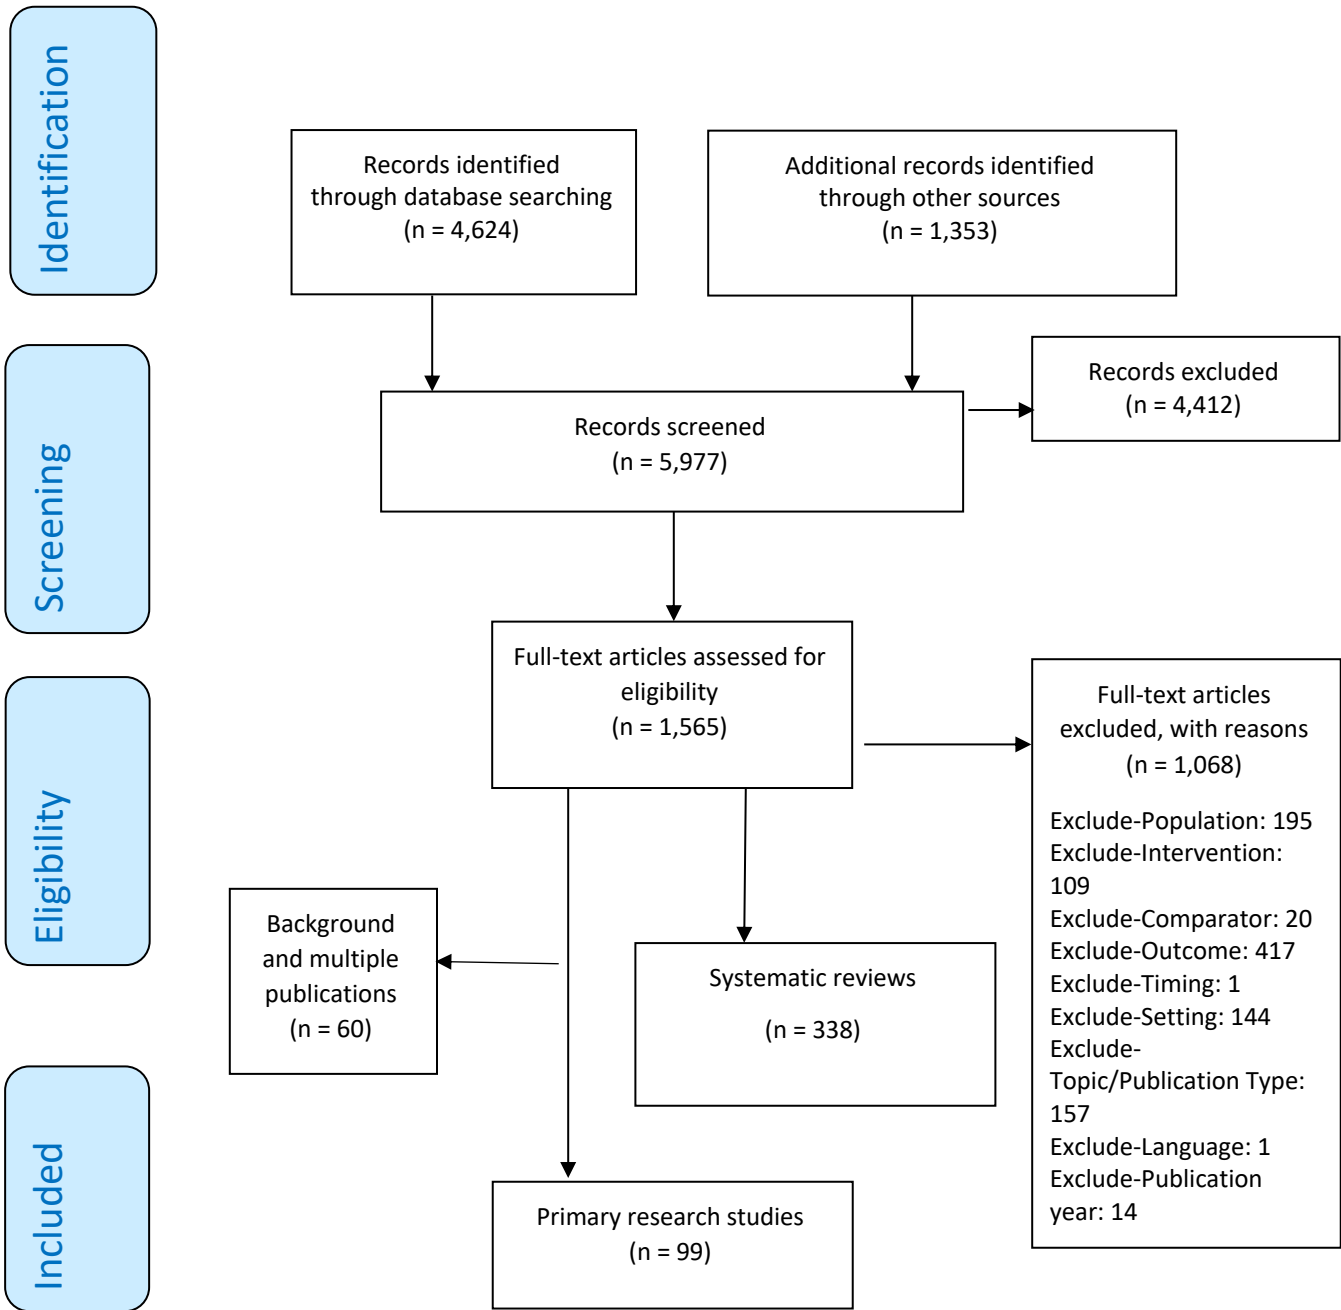

Supplement: OBY-27-1390-s002.pdf [file OBY-27-1390-s002.pdf]

### Supplementary Figure S5: Estimated effects of school-based initiatives on energy expended

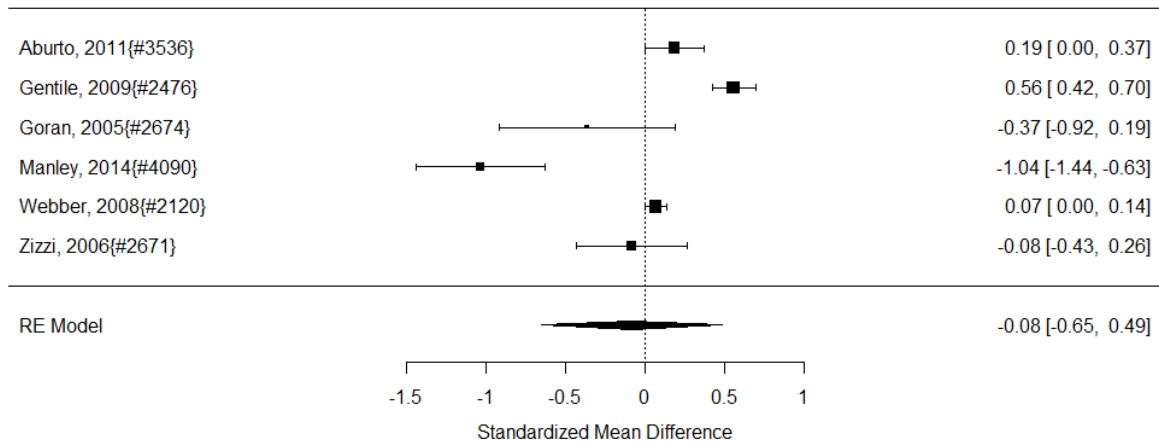

Supplement: OBY-27-1390-s005.pdf [file OBY-27-1390-s005.pdf]
